# Supplementary material
Source: Springer Nature journal article supplement (https://www.springermedizin.de/resource/supplementary/13075_2010_9703_MOESM1_ESM.pdf/9693532)

**A)**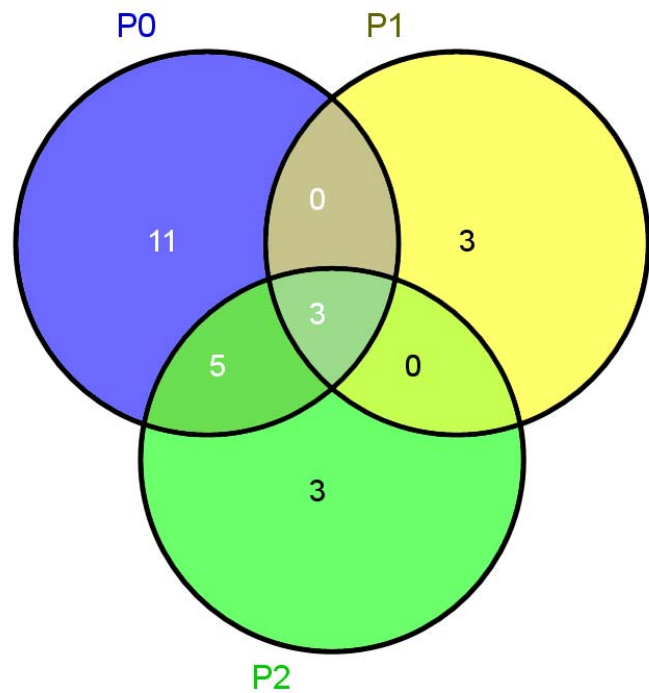**B)**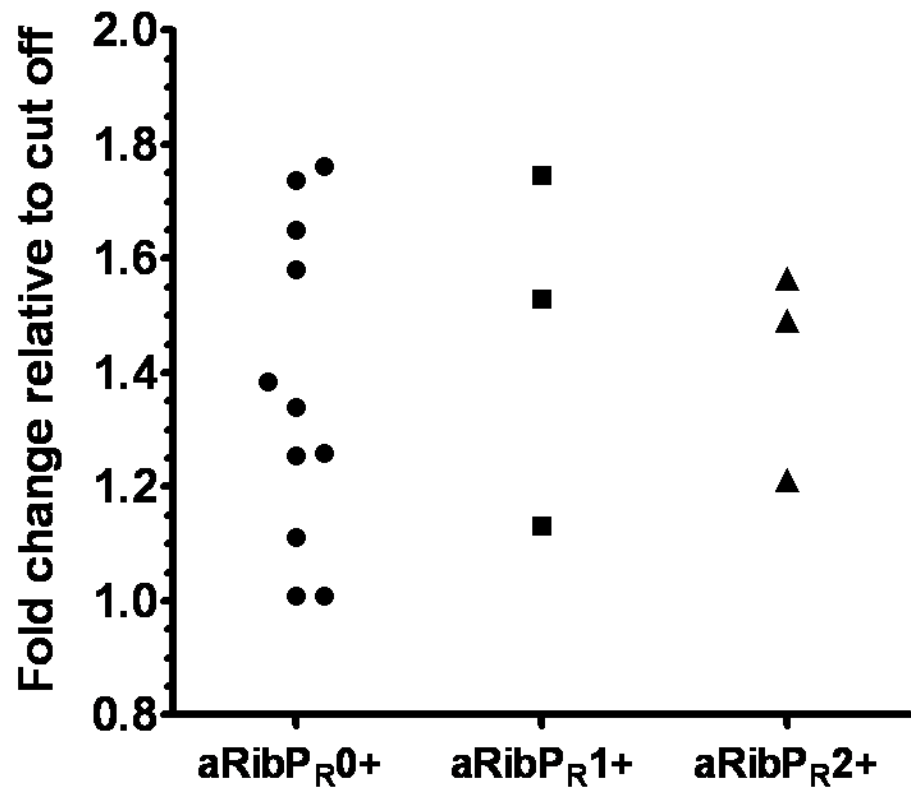

Supplement: MOESM1 [file 9693532]
